# Supplementary material for: Intramuscular Artesunate for Severe Malaria in African Children: A Multicenter Randomized Controlled Trial
Source: PLoS Med. 2016 Jan 12;13(1):e1001938. doi: 10.1371/journal.pmed.1001938 (PMC4710539; doi:10.1371/journal.pmed.1001938)
Supplement: S1 Data — (XLSX) [file pmed.1001938.s001.xlsx]

## Sheet: Sheet1
90.parasite.reduction	99.parasite.reduction	100.parasite.reduction	Treatment
18	24	42	3 dose IM	PC90	18	30	12	6	18	12	12	18	30	12	18	12	.	18	12	12	18	6	12	12	12	12	18	18	18	6	12	6	24	18	24	12	6	18	18	18	6	18	18	18	18	30	12	12	12
30	36	60	3 dose IM	PC99	24	36	12	12	24	12	18	30	30	12	18	18	.	24	12	12	18	12	24	12	18	12	18	24	18	12	18	12	24	30	30	18	12	18	18	24	12	30	18	30	36	36	18	12	18
12	12	24	3 dose IM	PC100	42	60	24	24	36	36	30	54	42	24	24	42	.	36	24	24	36	30	48	42	36	42	42	60	48	48	48	18	60	42	42	42	24	60	36	48	24	30	36	54	60	54	36	36	18
6	12	24	3 dose IM
18	24	36	3 dose IM
12	12	36	3 dose IM
12	18	30	3 dose IM
18	30	54	3 dose IM
30	30	42	3 dose IM
12	12	24	3 dose IM
18	18	24	3 dose IM
12	18	42	3 dose IM
.	.	.	3 dose IM
18	24	36	3 dose IM
12	12	24	3 dose IM
12	12	24	3 dose IM
18	18	36	3 dose IM
6	12	30	3 dose IM
12	24	48	3 dose IM
12	12	42	3 dose IM
12	18	36	3 dose IM
12	12	42	3 dose IM
18	18	42	3 dose IM
18	24	60	3 dose IM
18	18	48	3 dose IM
6	12	48	3 dose IM
12	18	48	3 dose IM
6	12	18	3 dose IM
24	24	60	3 dose IM
18	30	42	3 dose IM
24	30	42	3 dose IM
12	18	42	3 dose IM
6	12	24	3 dose IM
18	18	60	3 dose IM
18	18	36	3 dose IM
18	24	48	3 dose IM
6	12	24	3 dose IM
18	30	30	3 dose IM
18	18	36	3 dose IM
18	30	54	3 dose IM
18	36	60	3 dose IM
30	36	54	3 dose IM
12	18	36	3 dose IM
12	12	36	3 dose IM
12	18	18	3 dose IM
12	18	48	3 dose IM
12	18	48	3 dose IM
12	30	60	3 dose IM
12	24	36	3 dose IM
12	18	48	3 dose IM
18	30	36	3 dose IM
18	30	48	3 dose IM
12	12	30	3 dose IM
12	18	36	3 dose IM
24	30	48	3 dose IM
18	24	36	3 dose IM
.	.	.	3 dose IM
18	18	42	3 dose IM
18	18	36	3 dose IM
12	30	42	3 dose IM
12	18	30	3 dose IM
12	18	30	3 dose IM
24	36	48	3 dose IM
12	18	36	3 dose IM
.	.	.	3 dose IM
12	18	18	3 dose IM
18	24	30	3 dose IM
18	18	30	3 dose IM
12	18	24	3 dose IM
12	18	30	3 dose IM
18	30	36	3 dose IM
12	18	24	3 dose IM
12	18	36	3 dose IM
12	24	42	3 dose IM
12	18	30	3 dose IM
12	18	36	3 dose IM
6	18	36	3 dose IM
12	30	42	3 dose IM
18	24	42	3 dose IM
12	24	30	3 dose IM
30	30	48	3 dose IM
12	18	30	3 dose IM
18	18	18	3 dose IM
24	36	36	3 dose IM
12	12	12	3 dose IM
12	12	18	3 dose IM
18	24	30	3 dose IM
12	24	30	3 dose IM
24	30	42	3 dose IM
18	24	36	3 dose IM
12	18	24	3 dose IM
18	24	30	3 dose IM
12	12	18	3 dose IM
18	24	36	3 dose IM
12	18	30	3 dose IM
18	18	30	3 dose IM
6	12	18	3 dose IM
12	24	36	3 dose IM
6	12	18	3 dose IM
6	12	18	3 dose IM
12	12	12	3 dose IM
12	24	36	3 dose IM
12	18	24	3 dose IM
12	18	18	3 dose IM
12	24	30	3 dose IM
12	12	24	3 dose IM
12	24	30	3 dose IM
18	24	30	3 dose IM
24	24	30	3 dose IM
18	24	30	3 dose IM
6	12	18	3 dose IM
18	18	24	3 dose IM
12	18	30	3 dose IM
12	18	30	3 dose IM
12	12	30	3 dose IM
24	30	36	3 dose IM
6	18	24	3 dose IM
18	24	36	3 dose IM
24	30	36	3 dose IM
12	24	30	3 dose IM
12	18	30	3 dose IM
6	12	30	3 dose IM
18	24	36	3 dose IM
6	18	24	3 dose IM
18	24	30	3 dose IM
12	18	36	3 dose IM
18	24	36	3 dose IM
18	18	18	3 dose IM
18	36	36	3 dose IM
18	24	30	3 dose IM
12	24	24	3 dose IM
12	18	36	3 dose IM
12	18	54	3 dose IM
12	24	36	3 dose IM
12	18	30	3 dose IM
12	12	30	3 dose IM
12	24	54	3 dose IM
12	18	36	3 dose IM
18	18	36	3 dose IM
12	18	24	3 dose IM
12	12	30	3 dose IM
12	18	24	3 dose IM
12	18	42	3 dose IM
12	18	30	3 dose IM
18	18	24	3 dose IM
18	18	36	3 dose IM
18	24	42	3 dose IM
18	18	42	3 dose IM
18	18	30	3 dose IM
12	18	36	3 dose IM
12	24	36	3 dose IM
12	12	36	3 dose IM
12	12	18	3 dose IM
12	18	36	3 dose IM
18	42	48	3 dose IM
18	30	48	3 dose IM
12	12	30	3 dose IM
12	18	24	3 dose IM
6	6	18	3 dose IM
18	24	30	3 dose IM
18	18	42	3 dose IM
12	18	36	3 dose IM
18	18	30	3 dose IM
12	18	30	3 dose IM
18	18	42	3 dose IM
12	18	42	3 dose IM
18	18	42	3 dose IM
18	30	42	3 dose IM
18	24	42	3 dose IM
18	24	42	3 dose IM
12	12	36	3 dose IM
12	18	36	3 dose IM
12	18	36	3 dose IM
12	18	42	3 dose IM
6	12	18	3 dose IM
24	30	48	3 dose IM
36	42	84	3 dose IM
24	36	54	3 dose IM
30	42	60	3 dose IM
.	.	.	3 dose IM
12	24	42	3 dose IM
18	24	54	3 dose IM
36	48	66	3 dose IM
24	30	42	3 dose IM
18	18	30	3 dose IM
12	12	24	3 dose IM
6	18	42	3 dose IM
18	36	54	3 dose IM
12	30	48	3 dose IM
42	54	78	3 dose IM
30	42	60	3 dose IM
6	12	36	3 dose IM
12	18	36	3 dose IM
18	18	36	3 dose IM
18	18	54	3 dose IM
12	30	36	3 dose IM
30	42	72	3 dose IM
18	24	48	3 dose IM
36	42	78	3 dose IM
18	24	48	3 dose IM
12	18	48	3 dose IM
18	36	42	3 dose IM
12	18	42	3 dose IM
6	30	36	3 dose IM
24	24	54	3 dose IM
6	18	36	3 dose IM
12	12	24	3 dose IM
18	30	42	3 dose IM
12	18	24	3 dose IM
72	72	72	3 dose IM
18	18	24	3 dose IM
12	18	18	3 dose IM
18	36	54	3 dose IM
18	24	54	3 dose IM
18	24	42	3 dose IM
12	30	48	3 dose IM
18	30	36	3 dose IM
18	18	48	3 dose IM
18	18	36	3 dose IM
18	30	48	3 dose IM
36	42	42	3 dose IM
6	12	12	3 dose IM
12	24	42	3 dose IM
24	36	54	3 dose IM
24	30	48	3 dose IM
18	24	36	3 dose IM
18	24	42	3 dose IM
18	24	42	3 dose IM
18	24	54	3 dose IM
6	18	30	3 dose IM
12	18	36	3 dose IM
18	24	24	3 dose IM
30	36	72	3 dose IM
12	12	24	3 dose IM
12	12	30	3 dose IM
12	18	36	3 dose IM
12	12	30	3 dose IM
18	36	54	3 dose IM
18	18	36	3 dose IM
24	24	30	3 dose IM
18	24	54	3 dose IM
18	18	24	3 dose IM
12	18	42	3 dose IM
12	30	54	3 dose IM
24	30	48	3 dose IM
18	24	48	3 dose IM
12	12	24	3 dose IM
18	24	54	3 dose IM
18	24	42	3 dose IM
12	18	48	3 dose IM
12	24	30	3 dose IM
6	6	24	3 dose IM
6	18	54	3 dose IM
18	30	54	3 dose IM
12	18	54	3 dose IM
18	30	54	3 dose IM
18	24	54	3 dose IM
12	18	30	3 dose IM
12	18	30	3 dose IM
18	24	42	3 dose IM
12	12	36	3 dose IM
30	36	48	3 dose IM
12	18	30	3 dose IM
18	18	36	3 dose IM
12	18	42	3 dose IM
24	24	42	3 dose IM
12	18	36	3 dose IM
18	18	42	3 dose IM
6	24	36	3 dose IM
18	30	42	3 dose IM
18	24	54	3 dose IM
18	24	48	3 dose IM
18	24	36	3 dose IM
12	24	48	3 dose IM
18	18	54	3 dose IM
18	24	54	3 dose IM
18	30	72	3 dose IM
18	24	54	3 dose IM
18	24	48	3 dose IM
18	30	72	3 dose IM
24	24	48	3 dose IM
12	24	54	3 dose IM
12	18	36	3 dose IM
24	24	66	3 dose IM
18	24	48	3 dose IM
30	36	72	3 dose IM
12	18	54	3 dose IM
18	36	66	3 dose IM
12	12	54	3 dose IM
12	12	42	3 dose IM
18	24	78	3 dose IM
18	24	66	3 dose IM
18	18	48	3 dose IM
18	30	60	3 dose IM
12	18	72	3 dose IM
18	18	54	3 dose IM
12	18	66	3 dose IM
18	24	66	3 dose IM
12	18	42	3 dose IM
18	24	66	3 dose IM
12	24	54	3 dose IM
12	24	60	3 dose IM
24	36	72	3 dose IM
18	24	60	3 dose IM
12	18	48	3 dose IM
12	18	48	3 dose IM
12	24	66	3 dose IM
12	18	60	3 dose IM
12	24	42	3 dose IM
18	24	48	3 dose IM
12	12	48	3 dose IM
18	18	54	3 dose IM
12	18	48	3 dose IM
18	18	42	3 dose IM
12	18	48	3 dose IM
18	24	48	3 dose IM
18	18	60	3 dose IM
6	12	36	3 dose IM
18	24	54	3 dose IM
12	18	72	3 dose IM
12	18	36	3 dose IM
12	12	24	3 dose IM
24	30	48	3 dose IM
12	18	18	3 dose IM
36	36	36	3 dose IM
18	18	30	3 dose IM
24	30	48	3 dose IM
24	30	72	3 dose IM
12	12	30	3 dose IM
12	18	30	3 dose IM
12	24	30	3 dose IM
12	18	30	3 dose IM
18	24	36	3 dose IM
6	18	24	3 dose IM
18	30	72	3 dose IM
12	30	42	3 dose IM
24	30	48	3 dose IM
12	30	36	3 dose IM
18	30	72	3 dose IM
6	12	24	3 dose IM
6	30	30	3 dose IM
18	24	24	3 dose IM
.	.	.	3 dose IM
12	24	24	3 dose IM
6	12	18	3 dose IM
18	30	36	3 dose IM
6	18	18	3 dose IM
.	.	.	3 dose IM
6	12	18	3 dose IV
24	24	36	3 dose IV
12	30	36	3 dose IV
24	30	42	3 dose IV
24	24	36	3 dose IV
24	24	30	3 dose IV
18	24	30	3 dose IV
12	18	36	3 dose IV
.	.	.	3 dose IV
12	18	36	3 dose IV
18	36	42	3 dose IV
18	30	54	3 dose IV
12	12	24	3 dose IV
12	18	72	3 dose IV
18	18	30	3 dose IV
18	24	42	3 dose IV
18	30	48	3 dose IV
18	18	30	3 dose IV
24	24	42	3 dose IV
18	24	48	3 dose IV
18	24	42	3 dose IV
24	72	72	3 dose IV
18	18	48	3 dose IV
12	18	36	3 dose IV
18	24	72	3 dose IV
18	30	72	3 dose IV
12	18	72	3 dose IV
36	36	72	3 dose IV
12	18	60	3 dose IV
12	18	30	3 dose IV
18	36	72	3 dose IV
12	18	42	3 dose IV
6	12	24	3 dose IV
.	.	.	3 dose IV
12	18	42	3 dose IV
18	24	72	3 dose IV
18	24	42	3 dose IV
12	18	24	3 dose IV
12	18	42	3 dose IV
12	24	36	3 dose IV
12	12	36	3 dose IV
18	30	42	3 dose IV
24	30	42	3 dose IV
24	30	48	3 dose IV
18	18	36	3 dose IV
6	18	42	3 dose IV
12	18	48	3 dose IV
18	24	48	3 dose IV
18	42	66	3 dose IV
6	6	18	3 dose IV
6	12	72	3 dose IV
12	18	24	3 dose IV
6	12	30	3 dose IV
18	30	48	3 dose IV
18	18	36	3 dose IV
12	18	36	3 dose IV
12	18	30	3 dose IV
12	18	30	3 dose IV
18	30	36	3 dose IV
18	24	48	3 dose IV
.	.	.	3 dose IV
18	18	24	3 dose IV
18	24	36	3 dose IV
12	18	36	3 dose IV
12	12	24	3 dose IV
12	18	30	3 dose IV
18	18	24	3 dose IV
18	24	30	3 dose IV
12	18	30	3 dose IV
18	18	36	3 dose IV
12	18	24	3 dose IV
12	12	12	3 dose IV
18	24	42	3 dose IV
6	12	30	3 dose IV
24	36	36	3 dose IV
12	12	24	3 dose IV
18	24	48	3 dose IV
24	24	48	3 dose IV
24	30	42	3 dose IV
18	30	48	3 dose IV
18	24	42	3 dose IV
12	18	18	3 dose IV
12	12	12	3 dose IV
18	18	30	3 dose IV
24	30	42	3 dose IV
6	12	18	3 dose IV
12	18	30	3 dose IV
18	24	30	3 dose IV
12	24	30	3 dose IV
.	.	.	3 dose IV
18	18	30	3 dose IV
6	12	12	3 dose IV
18	18	30	3 dose IV
12	24	42	3 dose IV
12	18	36	3 dose IV
24	24	36	3 dose IV
24	30	36	3 dose IV
18	24	36	3 dose IV
12	18	30	3 dose IV
12	12	24	3 dose IV
18	24	42	3 dose IV
30	36	48	3 dose IV
12	18	42	3 dose IV
12	12	30	3 dose IV
18	24	24	3 dose IV
12	18	24	3 dose IV
12	18	30	3 dose IV
24	30	36	3 dose IV
6	12	24	3 dose IV
18	18	30	3 dose IV
72	72	72	3 dose IV
24	30	42	3 dose IV
12	12	24	3 dose IV
18	18	30	3 dose IV
18	18	24	3 dose IV
30	36	36	3 dose IV
18	18	30	3 dose IV
18	30	30	3 dose IV
12	30	30	3 dose IV
24	24	30	3 dose IV
12	18	18	3 dose IV
24	30	42	3 dose IV
18	24	24	3 dose IV
12	18	24	3 dose IV
12	18	24	3 dose IV
18	24	24	3 dose IV
18	18	24	3 dose IV
18	30	42	3 dose IV
18	18	30	3 dose IV
6	12	12	3 dose IV
18	24	24	3 dose IV
18	24	42	3 dose IV
12	36	54	3 dose IV
12	18	48	3 dose IV
12	18	36	3 dose IV
6	6	12	3 dose IV
12	18	36	3 dose IV
30	30	54	3 dose IV
6	6	36	3 dose IV
12	18	72	3 dose IV
18	36	42	3 dose IV
12	12	36	3 dose IV
12	18	30	3 dose IV
12	12	24	3 dose IV
18	24	42	3 dose IV
18	24	42	3 dose IV
18	24	42	3 dose IV
18	18	36	3 dose IV
18	18	36	3 dose IV
12	30	48	3 dose IV
12	36	36	3 dose IV
12	24	36	3 dose IV
12	12	42	3 dose IV
12	18	24	3 dose IV
12	18	36	3 dose IV
12	24	24	3 dose IV
36	48	48	3 dose IV
18	18	42	3 dose IV
12	24	42	3 dose IV
18	18	42	3 dose IV
12	18	42	3 dose IV
24	30	42	3 dose IV
12	24	42	3 dose IV
12	30	42	3 dose IV
12	18	30	3 dose IV
24	24	48	3 dose IV
12	18	30	3 dose IV
12	18	36	3 dose IV
12	18	30	3 dose IV
12	12	30	3 dose IV
12	24	48	3 dose IV
12	18	36	3 dose IV
24	24	54	3 dose IV
12	24	48	3 dose IV
12	18	36	3 dose IV
12	18	30	3 dose IV
72	72	72	3 dose IV
24	36	48	3 dose IV
18	24	48	3 dose IV
12	18	36	3 dose IV
24	30	54	3 dose IV
12	18	30	3 dose IV
18	24	60	3 dose IV
12	18	36	3 dose IV
30	36	60	3 dose IV
12	12	48	3 dose IV
30	30	54	3 dose IV
18	24	78	3 dose IV
.	.	.	3 dose IV
18	18	48	3 dose IV
6	12	30	3 dose IV
30	36	66	3 dose IV
12	18	36	3 dose IV
18	30	54	3 dose IV
12	30	36	3 dose IV
12	24	30	3 dose IV
36	54	84	3 dose IV
18	30	42	3 dose IV
18	36	48	3 dose IV
12	18	54	3 dose IV
24	30	66	3 dose IV
30	36	48	3 dose IV
.	.	.	3 dose IV
18	24	72	3 dose IV
12	30	36	3 dose IV
30	36	42	3 dose IV
18	18	18	3 dose IV
30	30	54	3 dose IV
24	36	48	3 dose IV
18	24	36	3 dose IV
12	12	24	3 dose IV
18	18	30	3 dose IV
24	30	48	3 dose IV
18	24	54	3 dose IV
12	18	30	3 dose IV
18	18	36	3 dose IV
12	24	30	3 dose IV
24	24	54	3 dose IV
6	6	30	3 dose IV
24	36	36	3 dose IV
30	36	78	3 dose IV
12	12	42	3 dose IV
18	24	48	3 dose IV
12	24	36	3 dose IV
24	30	54	3 dose IV
6	18	30	3 dose IV
24	24	42	3 dose IV
18	18	42	3 dose IV
18	24	30	3 dose IV
12	18	30	3 dose IV
12	12	12	3 dose IV
36	36	54	3 dose IV
6	30	30	3 dose IV
12	18	36	3 dose IV
18	18	24	3 dose IV
30	36	60	3 dose IV
18	30	36	3 dose IV
12	18	30	3 dose IV
18	18	66	3 dose IV
12	18	30	3 dose IV
12	18	24	3 dose IV
30	42	72	3 dose IV
18	24	42	3 dose IV
24	30	36	3 dose IV
18	24	42	3 dose IV
6	12	24	3 dose IV
6	18	36	3 dose IV
6	12	24	3 dose IV
18	30	54	3 dose IV
18	18	42	3 dose IV
12	24	42	3 dose IV
18	30	48	3 dose IV
12	12	24	3 dose IV
18	30	60	3 dose IV
18	30	42	3 dose IV
18	24	30	3 dose IV
24	36	48	3 dose IV
18	30	42	3 dose IV
18	24	42	3 dose IV
18	18	30	3 dose IV
.	.	.	3 dose IV
18	24	48	3 dose IV
18	24	54	3 dose IV
6	12	30	3 dose IV
24	30	42	3 dose IV
18	24	42	3 dose IV
24	24	54	3 dose IV
30	30	48	3 dose IV
18	24	42	3 dose IV
18	24	36	3 dose IV
18	24	48	3 dose IV
18	30	48	3 dose IV
18	24	42	3 dose IV
18	18	30	3 dose IV
18	24	36	3 dose IV
18	18	36	3 dose IV
12	18	36	3 dose IV
12	30	48	3 dose IV
24	30	60	3 dose IV
12	18	66	3 dose IV
12	24	66	3 dose IV
12	24	60	3 dose IV
18	24	54	3 dose IV
12	18	48	3 dose IV
12	12	66	3 dose IV
18	24	60	3 dose IV
12	30	84	3 dose IV
18	24	54	3 dose IV
18	18	36	3 dose IV
18	24	48	3 dose IV
12	18	48	3 dose IV
18	24	42	3 dose IV
18	24	66	3 dose IV
12	12	66	3 dose IV
12	24	78	3 dose IV
12	24	66	3 dose IV
24	36	72	3 dose IV
18	24	66	3 dose IV
24	24	60	3 dose IV
6	12	60	3 dose IV
12	18	48	3 dose IV
12	18	54	3 dose IV
18	24	48	3 dose IV
18	30	66	3 dose IV
24	36	66	3 dose IV
6	18	48	3 dose IV
24	30	60	3 dose IV
18	18	78	3 dose IV
12	18	72	3 dose IV
12	18	60	3 dose IV
12	18	48	3 dose IV
12	12	30	3 dose IV
18	30	54	3 dose IV
12	18	42	3 dose IV
18	30	66	3 dose IV
6	6	36	3 dose IV
12	12	30	3 dose IV
18	30	60	3 dose IV
18	18	36	3 dose IV
24	24	48	3 dose IV
30	42	72	3 dose IV
12	18	36	3 dose IV
12	12	42	3 dose IV
24	24	78	3 dose IV
12	24	54	3 dose IV
12	24	48	3 dose IV
18	24	42	3 dose IV
12	18	24	3 dose IV
30	36	48	3 dose IV
6	12	24	3 dose IV
18	24	72	3 dose IV
12	24	24	3 dose IV
6	12	24	3 dose IV
12	18	30	3 dose IV
12	12	36	3 dose IV
18	24	42	3 dose IV
12	12	30	3 dose IV
18	30	42	3 dose IV
6	12	12	3 dose IV
6	18	24	3 dose IV
6	12	24	3 dose IV
18	18	36	3 dose IV
24	48	72	3 dose IV
6	12	18	3 dose IV
12	12	18	3 dose IV
18	24	48	3 dose IV
18	36	72	3 dose IV
6	18	30	3 dose IV
18	30	36	3 dose IV
24	30	30	3 dose IV
12	18	36	3 dose IV
24	24	42	5 dose IM
12	18	36	5 dose IM
18	24	36	5 dose IM
36	42	66	5 dose IM
6	6	6	5 dose IM
24	30	42	5 dose IM
12	18	30	5 dose IM
18	24	42	5 dose IM
24	30	54	5 dose IM
12	18	30	5 dose IM
12	18	30	5 dose IM
12	24	30	5 dose IM
18	24	30	5 dose IM
18	24	72	5 dose IM
18	30	48	5 dose IM
24	42	48	5 dose IM
.	.	.	5 dose IM
.	.	.	5 dose IM
24	30	60	5 dose IM
12	18	36	5 dose IM
.	.	.	5 dose IM
6	6	24	5 dose IM
24	30	42	5 dose IM
24	24	36	5 dose IM
12	18	48	5 dose IM
18	24	48	5 dose IM
24	30	42	5 dose IM
6	12	12	5 dose IM
12	24	30	5 dose IM
6	12	30	5 dose IM
18	24	36	5 dose IM
18	24	36	5 dose IM
18	24	60	5 dose IM
24	24	48	5 dose IM
18	24	30	5 dose IM
18	30	36	5 dose IM
24	30	54	5 dose IM
18	18	30	5 dose IM
18	30	48	5 dose IM
12	12	24	5 dose IM
36	36	54	5 dose IM
12	18	30	5 dose IM
12	12	24	5 dose IM
12	18	36	5 dose IM
.	.	.	5 dose IM
12	24	36	5 dose IM
6	18	42	5 dose IM
12	24	30	5 dose IM
6	6	24	5 dose IM
18	24	54	5 dose IM
24	24	42	5 dose IM
18	24	36	5 dose IM
18	24	54	5 dose IM
30	42	54	5 dose IM
12	12	36	5 dose IM
18	18	36	5 dose IM
12	18	30	5 dose IM
12	18	24	5 dose IM
18	18	30	5 dose IM
18	24	42	5 dose IM
18	24	42	5 dose IM
18	24	36	5 dose IM
18	24	48	5 dose IM
18	18	36	5 dose IM
12	18	36	5 dose IM
18	18	24	5 dose IM
24	24	30	5 dose IM
12	18	24	5 dose IM
18	18	30	5 dose IM
12	24	24	5 dose IM
18	24	24	5 dose IM
18	24	42	5 dose IM
18	24	48	5 dose IM
24	36	54	5 dose IM
18	24	42	5 dose IM
12	18	30	5 dose IM
12	12	30	5 dose IM
12	18	30	5 dose IM
18	24	30	5 dose IM
12	18	30	5 dose IM
6	12	18	5 dose IM
18	24	36	5 dose IM
12	18	18	5 dose IM
12	12	24	5 dose IM
18	24	30	5 dose IM
12	18	24	5 dose IM
18	18	24	5 dose IM
24	30	36	5 dose IM
18	18	36	5 dose IM
18	24	30	5 dose IM
12	12	24	5 dose IM
12	18	30	5 dose IM
6	18	18	5 dose IM
18	24	24	5 dose IM
18	18	30	5 dose IM
12	18	30	5 dose IM
18	24	36	5 dose IM
18	24	30	5 dose IM
12	24	30	5 dose IM
12	24	30	5 dose IM
12	18	18	5 dose IM
6	36	36	5 dose IM
6	12	18	5 dose IM
18	30	36	5 dose IM
18	24	30	5 dose IM
24	24	36	5 dose IM
24	24	42	5 dose IM
18	30	36	5 dose IM
12	18	24	5 dose IM
12	24	30	5 dose IM
24	36	42	5 dose IM
12	24	36	5 dose IM
24	30	42	5 dose IM
6	18	18	5 dose IM
24	30	36	5 dose IM
12	18	24	5 dose IM
18	24	24	5 dose IM
12	24	30	5 dose IM
12	18	24	5 dose IM
18	24	42	5 dose IM
18	18	18	5 dose IM
18	18	30	5 dose IM
24	30	30	5 dose IM
18	18	24	5 dose IM
18	24	24	5 dose IM
18	18	24	5 dose IM
24	24	30	5 dose IM
12	18	30	5 dose IM
18	18	24	5 dose IM
12	18	30	5 dose IM
18	18	30	5 dose IM
18	18	18	5 dose IM
18	18	30	5 dose IM
6	6	24	5 dose IM
18	18	30	5 dose IM
12	12	36	5 dose IM
12	18	36	5 dose IM
18	30	42	5 dose IM
12	18	42	5 dose IM
12	18	36	5 dose IM
.	.	.	5 dose IM
12	18	30	5 dose IM
12	12	18	5 dose IM
12	18	42	5 dose IM
36	36	54	5 dose IM
12	12	42	5 dose IM
12	18	48	5 dose IM
12	18	42	5 dose IM
18	18	42	5 dose IM
18	24	54	5 dose IM
12	18	42	5 dose IM
24	24	42	5 dose IM
12	12	24	5 dose IM
12	24	36	5 dose IM
18	18	24	5 dose IM
6	18	18	5 dose IM
12	18	24	5 dose IM
12	18	30	5 dose IM
12	12	48	5 dose IM
18	24	30	5 dose IM
18	30	42	5 dose IM
12	30	54	5 dose IM
18	18	42	5 dose IM
18	18	42	5 dose IM
12	12	24	5 dose IM
6	6	36	5 dose IM
12	18	36	5 dose IM
12	12	36	5 dose IM
12	24	42	5 dose IM
6	12	24	5 dose IM
12	12	30	5 dose IM
12	18	42	5 dose IM
18	24	36	5 dose IM
6	18	24	5 dose IM
6	12	30	5 dose IM
12	30	48	5 dose IM
12	12	24	5 dose IM
18	24	24	5 dose IM
18	24	42	5 dose IM
24	30	48	5 dose IM
24	30	66	5 dose IM
18	24	54	5 dose IM
24	24	30	5 dose IM
18	24	48	5 dose IM
24	30	42	5 dose IM
12	18	30	5 dose IM
72	72	72	5 dose IM
18	18	30	5 dose IM
18	24	72	5 dose IM
24	48	72	5 dose IM
18	24	30	5 dose IM
18	24	36	5 dose IM
12	18	48	5 dose IM
18	24	54	5 dose IM
30	30	60	5 dose IM
24	30	36	5 dose IM
24	30	66	5 dose IM
12	18	48	5 dose IM
24	36	54	5 dose IM
18	24	48	5 dose IM
18	30	54	5 dose IM
18	24	36	5 dose IM
30	36	54	5 dose IM
6	12	42	5 dose IM
18	30	54	5 dose IM
12	18	24	5 dose IM
18	18	36	5 dose IM
24	30	36	5 dose IM
24	30	48	5 dose IM
24	24	42	5 dose IM
72	72	72	5 dose IM
12	18	36	5 dose IM
30	36	54	5 dose IM
12	18	48	5 dose IM
18	18	36	5 dose IM
24	24	36	5 dose IM
6	24	36	5 dose IM
12	12	42	5 dose IM
24	30	54	5 dose IM
18	24	42	5 dose IM
18	24	36	5 dose IM
12	18	30	5 dose IM
24	30	42	5 dose IM
18	18	36	5 dose IM
18	18	30	5 dose IM
12	18	36	5 dose IM
18	24	36	5 dose IM
18	18	30	5 dose IM
24	24	48	5 dose IM
24	30	42	5 dose IM
18	24	54	5 dose IM
12	18	18	5 dose IM
18	18	24	5 dose IM
24	24	42	5 dose IM
24	30	42	5 dose IM
12	18	54	5 dose IM
18	24	48	5 dose IM
18	30	48	5 dose IM
24	24	30	5 dose IM
18	24	36	5 dose IM
18	30	42	5 dose IM
18	24	48	5 dose IM
24	30	30	5 dose IM
18	18	30	5 dose IM
12	18	36	5 dose IM
18	18	24	5 dose IM
18	24	42	5 dose IM
24	36	48	5 dose IM
18	18	30	5 dose IM
24	24	60	5 dose IM
18	24	48	5 dose IM
24	30	60	5 dose IM
12	18	30	5 dose IM
12	18	36	5 dose IM
12	12	24	5 dose IM
18	18	36	5 dose IM
18	24	30	5 dose IM
12	18	30	5 dose IM
18	30	30	5 dose IM
12	18	36	5 dose IM
12	18	36	5 dose IM
12	12	24	5 dose IM
12	18	36	5 dose IM
12	18	36	5 dose IM
18	24	42	5 dose IM
6	18	24	5 dose IM
18	30	48	5 dose IM
12	24	30	5 dose IM
12	18	24	5 dose IM
12	24	30	5 dose IM
18	24	42	5 dose IM
18	24	36	5 dose IM
18	30	60	5 dose IM
12	24	36	5 dose IM
18	18	42	5 dose IM
18	72	72	5 dose IM
24	36	78	5 dose IM
18	30	66	5 dose IM
18	24	54	5 dose IM
12	18	90	5 dose IM
24	30	60	5 dose IM
24	30	54	5 dose IM
12	18	60	5 dose IM
12	12	48	5 dose IM
12	18	54	5 dose IM
18	30	72	5 dose IM
18	18	54	5 dose IM
18	24	66	5 dose IM
12	18	48	5 dose IM
18	24	60	5 dose IM
24	24	72	5 dose IM
12	18	72	5 dose IM
12	18	60	5 dose IM
18	24	60	5 dose IM
12	12	48	5 dose IM
18	24	78	5 dose IM
18	24	54	5 dose IM
12	18	42	5 dose IM
12	12	42	5 dose IM
12	12	42	5 dose IM
18	24	60	5 dose IM
12	12	54	5 dose IM
24	30	66	5 dose IM
18	24	54	5 dose IM
18	18	36	5 dose IM
18	24	60	5 dose IM
12	18	60	5 dose IM
12	12	60	5 dose IM
18	24	66	5 dose IM
18	24	42	5 dose IM
6	12	36	5 dose IM
72	72	72	5 dose IM
18	24	48	5 dose IM
18	24	54	5 dose IM
12	12	42	5 dose IM
18	24	42	5 dose IM
18	18	48	5 dose IM
18	24	60	5 dose IM
6	6	18	5 dose IM
12	12	36	5 dose IM
24	24	48	5 dose IM
12	12	30	5 dose IM
.	.	.	5 dose IM
24	24	54	5 dose IM
18	24	36	5 dose IM
18	18	48	5 dose IM
24	24	24	5 dose IM
6	12	24	5 dose IM
24	30	36	5 dose IM
24	30	42	5 dose IM
6	6	18	5 dose IM
12	18	24	5 dose IM
6	12	12	5 dose IM
12	72	72	5 dose IM
12	12	18	5 dose IM
12	18	42	5 dose IM
42	72	72	5 dose IM
18	18	18	5 dose IM
12	18	24	5 dose IM
24	24	48	5 dose IM
18	30	72	5 dose IM
18	18	36	5 dose IM
12	30	42	5 dose IM
18	24	42	5 dose IM
24	30	72	5 dose IM
18	24	24	5 dose IM
18	18	42	5 dose IM
6	12	12	5 dose IM
[truncated: 303 more columns]
